# Supplementary material for: Formation of hierarchical bone-like apatites on silk microfiber templates via biomineralization
Source: Royal Society of Chemistry journal article supplement (doi:10.1039/c6ra17199k), 2016-01-01
Supplement: c6ra17199k1.pdf [file c6ra17199k1.pdf]

Electronic supplementary information (ESI)

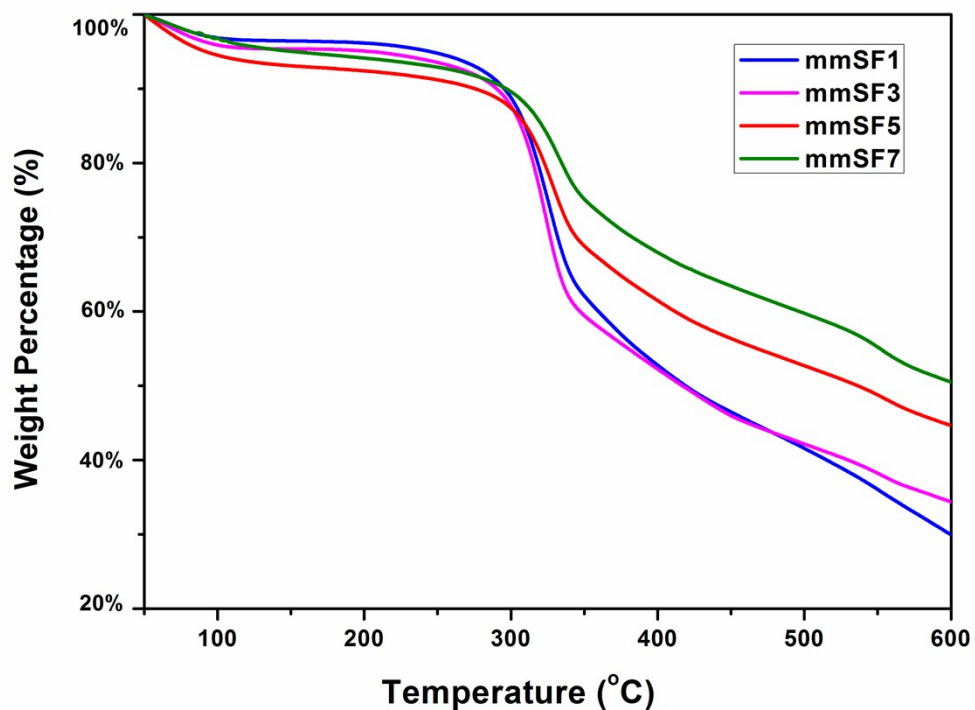

**Fig.S1** TGA curves of mineralized silk microfibers for different periods: 1 day, mmSF1; 3 days, mmSF3; 5 days, mmSF5; 7 days, mmSF7.
